# Supplementary material
Source: Springer Nature journal article supplement (https://www.springermedizin.de/resource/supplementary/12943_2014_1312_MOESM1_ESM.pdf/9552674)
Supplement: MOESM1 [file 9552674]

**Additional Table 1.**

Univariate Cox Proportional Hazards regression analysis of covariates in relation to survival of patients

| Covariate              | Overall survival |
|------------------------|------------------|
| Age                    | 0.029            |
| Sex                    | 0.636            |
| Smoking Status         | 0.394            |
| Tumor histology        | 0.582            |
| Stage                  | 0.038            |
| snoRA3 overexpression  | 0.002            |
| snoRA42 overexpression | 0.001            |

The numbers in the table represent P values calculated with the Wald test. P values <0.05 were considered statistically significant.

**Additional Table 2.**

Multivariate Cox proportional hazards regression analysis to evaluate the independent prognostic value of snoRNA signature and clinical parameters

| Covariate              | Overall survival |
|------------------------|------------------|
| Age                    | 0.026            |
| Sex                    | 0.625            |
| Smoking Status         | 0.401            |
| Tumor histology        | 0.634            |
| Stage                  | 0.043            |
| snoRA3 overexpression  | 0.003            |
| snoRA42 overexpression | 0.002            |

The numbers in the table represent P values calculated with the Wald test. P values <0.05 were considered statistically significant.

### Additional Table 3.

Primer sequences of genes tested

|                                                                                   |
|-----------------------------------------------------------------------------------|
| ACTBF: 5'-AGCCTCGCCTTTGCCGA-3', ACTBR: 5'-GCGCGGCGATATCATCAT-3'                   |
| SnoRA42F: 5'-TGGTAATGGATTTATGGTGGGT-3', SnoRA42R: 5'-GGACTGGGCAATGGTTCG-3'        |
| U6F: 5'-CTCGCTTCGGCAGCACA-3', U6: 5'-AACGCTTCACGAATTTGCGT -3'                     |
| ABCB1F: 5'-AAATTGGCTTGACAAGTTGTA TATGG-3', ABCB1R: 5'-CACCAGCATCATGAGAGGAAGTC-3'  |
| ABCG2F: 5'-TCA TCAGCCTCGATATCCATCT -3', ABCG2R: 5'-GGCCCGTGGAACATAAGTCTT-3'       |
| CD133F: 5'-TGGATGCAGAACTTGACAACGT-3', CD133R: 5'-ATACCTGCTACGACAGTCGTGGT-3'       |
| NanogF: 5'-AATACC TCAGCC TCCAGCAGATG -3', NanogR: 5'-TGCGTACACCATTG CTATTCTTC-3'; |
| NestinF: 5'-CTGCGGGCTACTGAAAAGTT-3', NestinR: 5'-AGGCTGAGGGACATCTTGAG-3'          |
| Notch1F: 5'-CCTGAGGGCTTCAAAGTGTC-3', Notch1R: 5'-CGGAACTTCTTG GTCTCCAG-3'         |
| Oct4F: 5'-CTTGCTGCAGAAGTGGGTGGAGGAA-3', Oct4R: 5'-CTGCAGTGTGGGTTTCGGGCA-3'        |
| SmoF: 5'-TGGTCACTCCCCTTTGTCCTCAC-3', SmoR: 5'-GCACGGTATCGGTAGTTCTTGTAGC-3'        |
| Sox2F: 5'-AAATGGGAG GGGTGCAAAAGAGGA G-3', Sox2R: 5'-CAGCTGTCATTTGCTGTGGGTGATG-3'. |
